# Supplementary material
Source: publisher figshare collection journal article supplement (https://acs.figshare.com/ndownloader/files/3809083)
Supplement: Supplementary file 1 [file 3809083]

# Supporting Information

## A Facile Peroxo-Precursor Synthesis Method and Structure Evolution of Large Specific Surface Area Mesoporous BaSnO<sub>3</sub>

Chuande Huang,<sup>1,2</sup> Xiaodong Wang,<sup>\*,1</sup> Quan Shi,<sup>\*,1</sup> Xin Liu,<sup>1</sup> Yan Zhang,<sup>3</sup> Fei

Huang,<sup>1,2</sup> and Tao Zhang<sup>1</sup>

<sup>1</sup>*Dalian Institute of Chemical Physics, Chinese Academy of Sciences, Dalian 116023,  
China*

<sup>2</sup>*University of Chinese Academy of Sciences, Beijing 100049, China*

<sup>3</sup>*Qingdao Institute of Bioenergy and Bioprocess Technology, Chinese Academy of  
Sciences, Qingdao 266101, China*

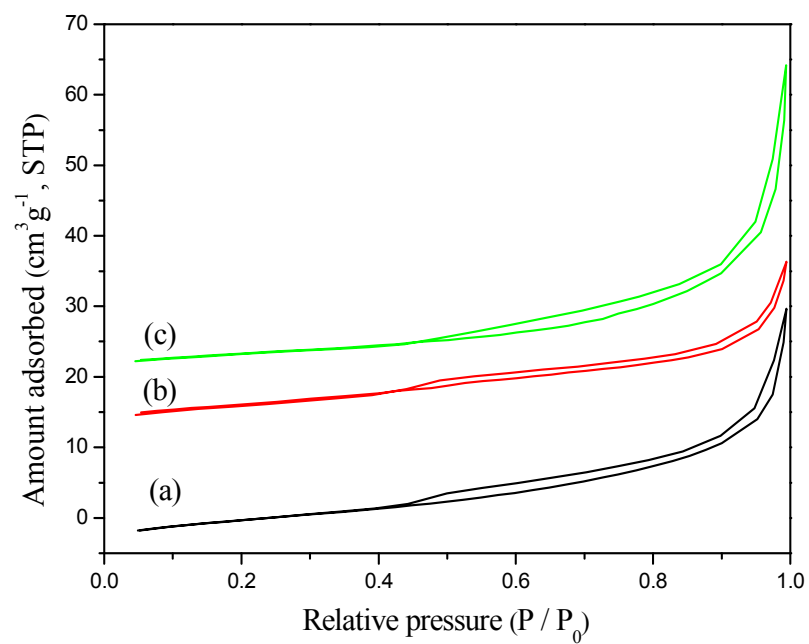

Figure S1. N<sub>2</sub> adsorption–desorption isotherms of (a) BS-120, (b) BS-200, and (c) BS-300.

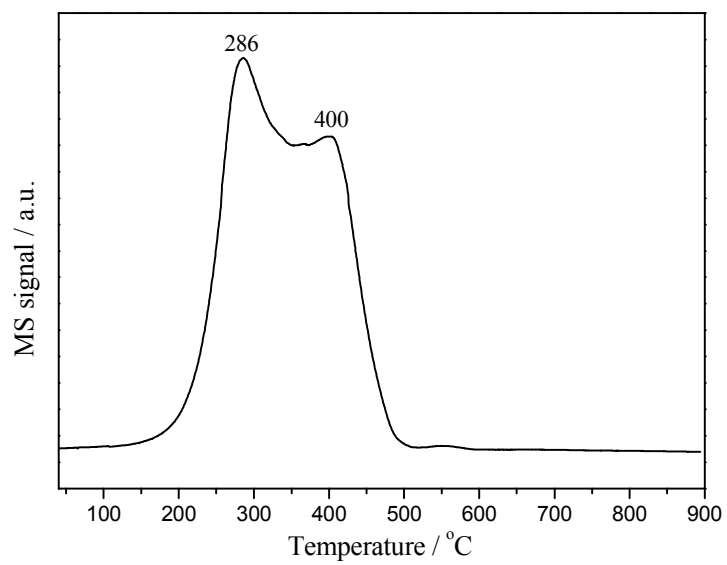

Figure S2. Signals of O<sub>2</sub> released during the heat-treatment of BS-200.
